# Supplementary material for: Mucormycosis: A 14-Year Retrospective Study from a Tertiary Care Center in Lebanon
Source: MDPI journal article supplement (doi:10.3390/jof9080824), 2023-08-03
Supplement: s1 [file s1]

| Variable                     | Number (%)     |
|------------------------------|----------------|
| Male                         | 25 (58.1%)     |
| Age*                         | 53 (38.0-64.0) |
| Greater Beirut               | 17 (39.5%)     |
| Charlson Comorbidity Index*  | 3 (2.0-5.0)    |
| Hematologic malignancy       | 29 (67.4%)     |
| AML                          | 14 (32.6%)     |
| ALL                          | 8 (18.6%)      |
| CML                          | 1 (2.3%)       |
| CLL                          | 1 (2.3%)       |
| MDS                          | 6 (14%)        |
| HL                           | 2 (4.7%)       |
| NHL                          | 2 (4.7%)       |
| MM                           | 0 (0%)         |
| Other hematologic malignancy | 2 (4.7%)       |
| Diabetes mellitus            | 15 (34.9%)     |
| Renal failure                | 5 (11.6%)      |
| Immunocompromise             | 38 (88.4%)     |
| Solid organ malignancy       | 3/43 (7%)      |
| Transplant                   |                |
| SOT                          | 1 (2.3%)       |
| autoBMT                      | 0 (0%)         |
| alloBMT                      | 9 (20.9%)      |
| GVHD                         | 5 (11.6%)      |
| Neutropenia at diagnosis     | 21 (48.8%)     |
| HIV                          | 0 (0%)         |
| Recent corticosteroids       | 22 (51.2%)     |
| Recent chemotherapy          | 30 (69.8%)     |
| Recent immunotherapy         | 2 (4.7%)       |
| Auto-immune disease          | 5 (11.6%)      |
| COVID-19                     | 5 (11.6%)      |
| COVID-19 treatment           |                |
| Corticosteroids              | 3 (7%)         |
| Convalescent                 | 1 (2.3%)       |
| Remdesivir                   | 3 (7%)         |
| Baricitinib                  | 0 (0%)         |
| Sotrovimab                   | 0 (0%)         |
| Tocilizumab                  | 1 (2.3%)       |
| Recent antifungals           | 19 (44.2%)     |
| Fluconazole                  | 6 (14.0%)      |
| Voriconazole                 | 16 (37.2%)     |
| Posaconazole                 | 2 (4.7%)       |
| Itraconazole                 | 0 (0%)         |
| Anidulafungin                | 1 (2.3%)       |
| Micafungin                   | 0 (0%)         |
| Abelcet                      | 0 (0%)         |
| Ambisome                     | 2 (4.7%)       |
| qSOFA at diagnosis           | 0 (0.0-1.0)    |
| Presentation of mucormycosis |                |
| Isolated ROCM                | 27 (62.8%)     |

|                                            |               |
|--------------------------------------------|---------------|
| Isolated pulmonary                         | 3 (7.0%)      |
| ROCM and pulmonary                         | 3 (7.0%)      |
| ROCM and SSTI                              | 2 (4.7%)      |
| GI                                         | 2 (4.7%)      |
| SSTI                                       | 6 (14.0%)     |
| Symptoms and signs                         |               |
| Fever                                      | 24/43 (55.8%) |
| Necrotic eschar                            | 17/43 (39.5%) |
| Ophthalmoplegia                            | 10/43 (23.3%) |
| Proptosis                                  | 7/43 (16.3%)  |
| Sinusitis                                  | 24/43 (55.8%) |
| Cough                                      | 6/43 (14.0%)  |
| Pleuritis                                  | 0/43 (0%)     |
| Biopsy                                     | 39 (90.7%)    |
| Hyphae on biopsy                           | 32/39 (82.1%) |
| Site of biopsy                             |               |
| Palate                                     | 5/39 (12.8%)  |
| Sino-nasal                                 | 22/39 (56.4%) |
| Soft tissue                                | 8/39 (20.5%)  |
| Lung                                       | 1/39 (2.6%)   |
| Bowel                                      | 1/39 (2.6%)   |
| Orbital                                    | 2/39 (5.1%)   |
| Culture                                    | 10/43 (23.3%) |
| Source of culture                          |               |
| Sino-nasal                                 | 6/10 (60%)    |
| Soft tissue                                | 1/10 (10%)    |
| Lung                                       | 3/10 (33%)    |
| Species                                    |               |
| Not identified                             | 17/43 (39.5%) |
| Rhizopus                                   | 6/43 (14.0%)  |
| Mucor                                      | 19/43 (44.2%) |
| Absidia                                    | 1/43 (2.3%)   |
| Imaging                                    |               |
| CT scan                                    | 28 (65.1%)    |
| MRI                                        | 17/43 (32.6%) |
| ROCM                                       | 32/43 (74.4%) |
| Imaging findings for ROCM                  |               |
| Severe soft tissue edema                   | 13/32         |
| Sinus mucoperiosteal thickening            | 13/32         |
| Bone erosion                               | 8/32          |
| Orbital invasion                           | 14/32         |
| Fat pad thickening/stranding               | 7/32          |
| Air/fluid level                            | 8/32          |
| Imaging findings of pulmonary mucormycosis |               |
| Consolidation/mass                         | 4/6           |
| Pleural effusion                           | 1/6           |
| Nodules                                    | 3/6           |
| Reverse halo                               | 0/6           |
| Air crescent                               | 1/6           |
| Infarcts                                   | 2/6           |

|                                               |                   |
|-----------------------------------------------|-------------------|
| Infiltrates                                   | 3/6               |
| Surgical debridement                          | 31 (72.1%)        |
| Days from diagnosis to surgery*               | 1.0 (0.0-2.0)     |
| Amphotericin B                                |                   |
| Did not receive Amphotericin B                | 2 (4.7%)          |
| Abelcet                                       | 8 (18.6%)         |
| Ambisome                                      | 33 (76.7%)        |
| Amphotericin B dose                           |                   |
| 5 mg/kg                                       | 18 (41.9%)        |
| 7.5 mg/kg                                     | 17 (39.5%)        |
| 10 mg/kg                                      | 8 (18.6%)         |
| Antifungal step-down                          |                   |
| Posaconazole                                  | 21 (48.8%)        |
| Isavuconazole                                 | 1 (11.6%)         |
| Caspofungin                                   | 5 (11.6%)         |
| Anidulafungin                                 | 2 (4.7%)          |
| No step-down                                  | 14 (32.6%)        |
| Duration of Amphotericin B (days)             | 21 (8.50-36.75)   |
| Adverse events                                |                   |
| Nephrotoxicity                                | 6 (14.0%)         |
| Hepatotoxicity                                | 1 (2.3%)          |
| Electrolytes anomalies                        | 10 (23.3%)        |
| Response to treatment                         |                   |
| Complete response                             | 6 (14.0%)         |
| Stable                                        | 17 (39.5%)        |
| Deterioration                                 | 20 (46.5%)        |
| In-hospital mortality                         | 20/43 (46.5%)     |
| Time from diagnosis to death                  | 20.50 (7.25-46.5) |
| Time from diagnosis to discharge in survivors | 29.00 (24.0-42.0) |

**Supplementary table 1.** Characteristics of the overall population of patients with mucormycosis. AML, acute myelogenous leukemia; ALL, acute lymphocytic leukemia; CML, chronic myelogenous leukemia; CLL, chronic lymphocytic leukemia; MDS, myelodysplasia; HL, Hodgkin's lymphoma; NHL, non-Hodgkin's lymphoma; MM, multiple myeloma; SOT, solid organ transplant; BMT, bone marrow transplant; GVHD, graft-versus-host disease; ROCM, rhino-orbito-cerebral mucormycosis; SSTI, skin and soft tissue infection; GI, gastrointestinal; CT, computed tomography; MRI, magnetic resonance imaging. \*median (interquartile range)
